# Supplementary material
Source: publisher figshare collection journal article supplement (https://aacr.figshare.com/ndownloader/files/40006866)
Supplement: Supplementary file 1 [file 40006866]

## Sheet: ST7.Tumor.topclone.table
Table S8. Top10 clones of tumor repertoire for each patient
ID	Time point	Rank	CDR3 (amino acid)	V segmentA	D segmentA	J segmentA	Freq. in tumor
0001	Pre	1	CASSFVLGELFF	TRBV7-9	ND	TRBJ2-2	0.0130037
		2	CASTLRSGTEAFF	TRBV7-2	ND	TRBJ1-1	0.00790909
		3	CASSQDGSRGSLNQPQHF	TRBV4-1	TRBD1	TRBJ1-5	0.00707379
		4	CASSISGTNYEQYF	TRBV27	TRBD1	TRBJ2-7	0.00652444
		5	CASSPIFAAGANVLTF	TRBV7-6	ND	TRBJ2-6	0.00644919
		6	CSVKTGGTNSPLHF	TRBV29-1	TRBD1	TRBJ1-6	0.006246
		7	CASSDRIGIVFGQETQYF	TRBV2	ND	TRBJ2-5	0.00594499
		8	CASATGTNSPLHF	TRBV25-1	TRBD1	TRBJ1-6	0.00514731
		9	CSAYEREAADTQYF	TRBV20-1	TRBD2	TRBJ2-3	0.00504948
		10	CASSFFYSSEQYF	TRBV27	ND	TRBJ2-7	0.00492907
	Post1	1	CASSPIFSGANVLTF	TRBV7-6	ND	TRBJ2-6	0.0271419
		2	CASSLIWQSGANVLTF	TRBV7-6	ND	TRBJ2-6	0.0270277
		3	CASSPIFAAGANVLTF	TRBV7-6	ND	TRBJ2-6	0.0169944
		4	CSVKTGGTNSPLHF	TRBV29-1	TRBD1	TRBJ1-6	0.012105
		5	CASATGTNSPLHF	TRBV25-1	TRBD1	TRBJ1-6	0.0120172
		6	CASWDLYNEQFF	TRBV27	TRBD1	TRBJ2-1	0.0104371
		7	CSVDDRGQTDTQYF	TRBV29-1	TRBD1	TRBJ2-3	0.00919944
		8	CATSDTTRRQGEQFF	TRBV24-1	TRBD1	TRBJ2-1	0.00828652
		9	CASSYSGDSNQPQHF	TRBV6-5	ND	TRBJ1-5	0.00734726
		10	CASTLRSGTEAFF	TRBV7-2	ND	TRBJ1-1	0.00720681
0002	Pre	1	CASSTGTSNYNEQFF	TRBV7-8	TRBD2	TRBJ2-1	0.0662243
		2	CASSYSGQEPYEQYF	TRBV6-5	ND	TRBJ2-7	0.0455464
		3	CSAKREGAEQFF	TRBV20-1	TRBD2	TRBJ2-1	0.0394202
		4	CASSFADGGPQHF	TRBV12-3	ND	TRBJ1-5	0.0356218
		5	CASSIGQGEIRNQPQHF	TRBV19	TRBD1	TRBJ1-5	0.0282178
		6	CASSETLGRGDGYTF	TRBV2	TRBD1	TRBJ1-2	0.0272975
		7	CASSQEWAGPPAYNEQFF	TRBV4-1	TRBD2	TRBJ2-1	0.0267567
		8	CASSDPSYNEQFF	TRBV6-5	ND	TRBJ2-1	0.0247673
		9	CASSYPGNAFF	TRBV6-2	TRBD1	TRBJ1-1	0.0208772
		10	CATSTTGLTYEQYF	TRBV27	TRBD1	TRBJ2-7	0.0182964
	Post1	1	CASSTGTSNYNEQFF	TRBV7-8	TRBD2	TRBJ2-1	0.0350748
		2	CASGNSYNEQFF	TRBV9	ND	TRBJ2-1	0.014695
		3	CSVEGIGGGEQYF	TRBV29-1	TRBD1	TRBJ2-7	0.0123059
		4	CASSESAGGDTQYF	TRBV10-2	TRBD2	TRBJ2-3	0.00994675
		5	CASSDPSYNEQFF	TRBV6-5	ND	TRBJ2-1	0.00934046
		6	CASSSGDSSSYEQYF	TRBV7-2	TRBD2	TRBJ2-7	0.00911836
		7	CASSIGQGEIRNQPQHF	TRBV19	TRBD1	TRBJ1-5	0.00819392
		8	CASRRLAGSSYEQYF	TRBV10-2	TRBD2	TRBJ2-7	0.00800783
		9	CATSTTGLTYEQYF	TRBV27	TRBD1	TRBJ2-7	0.00765966
		10	CASSLDSNYGYTF	TRBV7-2	ND	TRBJ1-2	0.00747357
0003	Pre	1	CASSLMADEQFF	TRBV11-3	ND	TRBJ2-1	0.349614
		2	CASSGDPGQGLKTQYF	TRBV5-6	TRBD1	TRBJ2-5	0.0976815
		3	CSARDGADTQYF	TRBV20-1	ND	TRBJ2-3	0.0572863
		4	CASSSRTSGTRNEQFF	TRBV9	TRBD2	TRBJ2-1	0.028683
		5	CASEWLRGDSPLHF	TRBV2	TRBD1	TRBJ1-6	0.0243009
		6	CASSLGIAQETQYF	TRBV11-3	ND	TRBJ2-5	0.0182456
		7	CASSPPGQENYGYTF	TRBV2	TRBD1	TRBJ1-2	0.0129073
		8	CASSLMTGELFF	TRBV11-3	ND	TRBJ2-2	0.0107561
		9	CASSERLRGRLKETQYF	TRBV6-1	TRBD2	TRBJ2-5	0.0101984
		10	CSARRATQYF	TRBV20-1	ND	TRBJ2-5	0.00940164
	Post1	1	CASSLMADEQFF	TRBV11-3	ND	TRBJ2-1	0.207288
		2	CASSPDRDHGYTF	TRBV14	TRBD1	TRBJ1-2	0.0471607
		3	CASSGDPGQGLKTQYF	TRBV5-6	TRBD1	TRBJ2-5	0.0467355
		4	CASTHGTYNEQFF	TRBV12-3	ND	TRBJ2-1	0.0237035
		5	CSARDGADTQYF	TRBV20-1	ND	TRBJ2-3	0.0161604
		6	CASSPSSGALNEQFF	TRBV7-3	TRBD2	TRBJ2-1	0.0154666
		7	CASEWLRGDSPLHF	TRBV2	TRBD1	TRBJ1-6	0.0149741
		8	CASSLSSGKVDEQFF	TRBV7-3	ND	TRBJ2-1	0.0148622
		9	CASSLRTGVDNEQFF	TRBV7-9	TRBD1	TRBJ2-1	0.0147279
		10	CASSLDAGTVNYEQYF	TRBV5-5	TRBD1	TRBJ2-7	0.0136536
0004	Pre	1	CASSLAGTGPVWTEAFF	TRBV13	TRBD1	TRBJ1-1	0.0769231
		2	CASSLRTSGSLDEQFF	TRBV3-1	TRBD2	TRBJ2-1	0.0272107
		3	CASSLTGLNEQFF	TRBV7-3	TRBD1	TRBJ2-1	0.0270133
		4	CASSLRGQGEGYTF	TRBV7-2	TRBD1	TRBJ1-2	0.023545
		5	CSAPGQRKPNEQFF	TRBV20-1	TRBD1	TRBJ2-1	0.0228401
		6	CAISDRGRVGANVLTF	TRBV10-3	TRBD1	TRBJ2-6	0.0183002
		7	CASSQGMSEAFF	TRBV4-1	ND	TRBJ1-1	0.0159316
		8	CASSLIGRADTQYF	TRBV7-3	TRBD2	TRBJ2-3	0.0154805
		9	CASSLGTSRDTQYF	TRBV27	ND	TRBJ2-3	0.0133939
		10	CASSFSWTSMDEQFF	TRBV28	TRBD2	TRBJ2-1	0.012266
	Post1	1	CASSLAGTGPVWTEAFF	TRBV13	TRBD1	TRBJ1-1	0.0337718
		2	CASKPRHLGYSNQPQHF	TRBV28	ND	TRBJ1-5	0.0210976
		3	CASSIRTGEANYGYTF	TRBV19	TRBD1	TRBJ1-2	0.0181968
		4	CSVELLNEQFF	TRBV29-1	ND	TRBJ2-1	0.0148609
		5	CASTSPGQGYTGELFF	TRBV19	TRBD1	TRBJ2-2	0.011737
		6	CASSLTGLNEQFF	TRBV7-3	TRBD1	TRBJ2-1	0.0101081
		7	CASSYNEFTGDEQFF	TRBV6-6	TRBD1	TRBJ2-1	0.00990729
		8	CASRPSGMGPNEQFF	TRBV12-3	TRBD2	TRBJ2-1	0.00740815
		9	CASSARLAPRTDTQYF	TRBV9	TRBD2	TRBJ2-3	0.00687262
		10	CASSAGEGSYEQYF	TRBV2	ND	TRBJ2-7	0.00687262
0005	Pre	1	CASLLEPSGGPLTYNEQFF	TRBV12-5	TRBD2	TRBJ2-1	0.0441728
		2	CASSLKRERADTQYF	TRBV5-1	TRBD2	TRBJ2-3	0.035011
		3	CSARSRTQPTNYGYTF	TRBV20-1	TRBD2	TRBJ1-2	0.0345425
		4	CAIRDEQRGGPSDTQYF	TRBV10-3	TRBD2	TRBJ2-3	0.0244214
		5	CASSLDALGRGEQYF	TRBV5-4	TRBD1	TRBJ2-7	0.0200785
		6	CASSLEESSYEQYF	TRBV7-9	ND	TRBJ2-7	0.0174758
		7	CSVGGTLDNEQFF	TRBV29-1	TRBD2	TRBJ2-1	0.0134452
		8	CASSPGQGLAEAFF	TRBV5-1	TRBD1	TRBJ1-1	0.0125454
		9	CASSSDPKTEAFF	TRBV5-1	ND	TRBJ1-1	0.0122479
		10	CASSPLGADTQYF	TRBV27	TRBD1	TRBJ2-3	0.0120546
0006	Pre	1	CAWSDSSVSYEQYF	TRBV30	ND	TRBJ2-7	0.010713
		2	CASSRTTDTQYF	TRBV19	ND	TRBJ2-3	0.00875668
		3	CASSQGSGGANYGYTF	TRBV4-1	TRBD1	TRBJ1-2	0.00735933
		4	CASSVLATPTDTQYF	TRBV9	TRBD2	TRBJ2-3	0.00701776
		5	CASSQSGEGSNQPQHF	TRBV23-1	TRBD2	TRBJ1-5	0.00701776
		6	CASSRTSGRGDTQYF	TRBV10-2	TRBD2	TRBJ2-3	0.00664514
		7	CASSMGQAPATQYF	TRBV6-5	TRBD1	TRBJ2-5	0.00664514
		8	CAWSVGAGGTEAFF	TRBV30	TRBD2	TRBJ1-1	0.00664514
		9	CSARFGSGYGYTF	TRBV20-1	ND	TRBJ1-2	0.00633462
		10	CASSFTTSGRYDNEQFF	TRBV7-3	TRBD2	TRBJ2-1	0.00630356
	Post1	1	CASSAGQGAYNSPLHF	TRBV6-1	TRBD1	TRBJ1-6	0.0367913
		2	CASSPDWGTEAFF	TRBV6-5	TRBD1	TRBJ1-1	0.0283895
		3	CASSFNFGQGDFYEQYF	TRBV11-2	TRBD1	TRBJ2-7	0.0270249
		4	CASSEGWEQQPQHF	TRBV25-1	ND	TRBJ1-5	0.0236534
		5	CAISPGLTVEQFF	TRBV10-3	TRBD2	TRBJ2-1	0.0234661
		6	CASSHTQTGENGYTF	TRBV12-3	TRBD2	TRBJ1-2	0.0203891
		7	CSARTSGDTGELFF	TRBV20-1	TRBD2	TRBJ2-2	0.0111043
		8	CASSPRLGLGNSPLHF	TRBV4-2	TRBD1	TRBJ1-6	0.011024
		9	CSAHRATGIYEQYF	TRBV20-1	TRBD1	TRBJ2-7	0.010248
		10	CASSLLGQGYGNEQFF	TRBV7-9	TRBD1	TRBJ2-1	0.010034
0007	Pre	1	CASSLRLARSHEQFF	TRBV27	ND	TRBJ2-1	0.0607525
		2	CASSFSGQGYSPLHF	TRBV27	TRBD1	TRBJ1-6	0.0493258
		3	CASTQTATPYNEQFF	TRBV27	ND	TRBJ2-1	0.0332574
		4	CASGTWGNTEAFF	TRBV2	TRBD1	TRBJ1-1	0.0256335
		5	CASSLLGSTDTQYF	TRBV7-3	ND	TRBJ2-3	0.0230493
		6	CASTLTGTPYNEQFF	TRBV27	TRBD1	TRBJ2-1	0.0221553
		7	CASSYSRGIDEQFF	TRBV6-2	ND	TRBJ2-1	0.0185178
		8	CASSVGDEQYF	TRBV9	ND	TRBJ2-7	0.0142497
		9	CASSLDPGAYEQYF	TRBV11-2	TRBD1	TRBJ2-7	0.0120758
		10	CASSDGGNGNSPLHF	TRBV6-1	TRBD2	TRBJ1-6	0.00894049
	Post1	1	CASTLTGTPYNEQFF	TRBV27	TRBD1	TRBJ2-1	0.163327
		2	CASSYSRGIDEQFF	TRBV6-2	ND	TRBJ2-1	0.0856113
		3	CASSFSGQGYSPLHF	TRBV27	TRBD1	TRBJ1-6	0.049205
		4	CASSFASGGSEQFF	TRBV12-3	TRBD2	TRBJ2-1	0.041153
		5	CASSLDPGAYEQYF	TRBV11-2	TRBD1	TRBJ2-7	0.0175296
		6	CASSYEVNGYQPQHF	TRBV6-6	ND	TRBJ1-5	0.0144592
		7	CASSVGDEQYF	TRBV9	ND	TRBJ2-7	0.0139109
		8	CASSEETRMGADTQYF	TRBV5-5	TRBD2	TRBJ2-3	0.0126733
		9	CASSPALAYTEAFF	TRBV4-1	ND	TRBJ1-1	0.0113731
		10	CASSQDEGNGAGELFF	TRBV4-2	TRBD1	TRBJ2-2	0.00930524
0008	Pre	1	CSVEEFNEQFF	TRBV29-1	ND	TRBJ2-1	0.0492083
		2	CSVSSAGGSDGANVLTF	TRBV29-1	TRBD1	TRBJ2-6	0.0438354
		3	CASSISWRGYNEQFF	TRBV28	TRBD2	TRBJ2-1	0.0371212
		4	CSVELYNEQFF	TRBV29-1	ND	TRBJ2-1	0.0318114
		5	CASNGGRSYNEQFF	TRBV28	TRBD1	TRBJ2-1	0.0308094
		6	CSVEVYNEQFF	TRBV29-1	ND	TRBJ2-1	0.0165921
		7	CASSSAGTGGDEQFF	TRBV5-1	TRBD1	TRBJ2-1	0.0152272
		8	CSVETPGHNTEAFF	TRBV29-1	TRBD1	TRBJ1-1	0.00934933
		9	CASSYQGLRGYTF	TRBV6-6	TRBD1	TRBJ1-2	0.00623289
		10	CSARPGTGLVLYNSPLHF	TRBV20-1	TRBD1	TRBJ1-6	0.00618555
	Post1	1	CASSFSGGDEQFF	TRBV6-5	ND	TRBJ2-1	0.0796457
		2	CASSPTSSRYEQYF	TRBV9	TRBD2	TRBJ2-7	0.0718847
		3	CASSLYQRGLQETQYF	TRBV27	TRBD1	TRBJ2-5	0.0705994
		4	CASSQGPTYEQYF	TRBV7-2	TRBD1	TRBJ2-7	0.0377755
		5	CASSYSGGDEQYF	TRBV6-5	TRBD1	TRBJ2-7	0.029759
		6	CASSIRGLGNIQYF	TRBV13	TRBD2	TRBJ2-4	0.0259032
		7	CASSQDLGPEQYF	TRBV4-1	ND	TRBJ2-7	0.0231514
		8	CSARDLHGGYEQYF	TRBV20-1	ND	TRBJ2-7	0.019757
		9	CASSLAGSNQPQHF	TRBV11-2	ND	TRBJ1-5	0.0186365
		10	CSARDEGERQYF	TRBV20-1	TRBD1	TRBJ2-7	0.0134789
0009	Pre	1	CASSYSAGTGGVRSEQYF	TRBV6-5	TRBD1	TRBJ2-7	0.0342693
		2	CAWSHGAATDTQYF	TRBV30	TRBD1	TRBJ2-3	0.0258385
		3	CASSLGQDTEAFF	TRBV7-3	TRBD1	TRBJ1-1	0.0236263
		4	CASSHDRGRREQYF	TRBV7-2	TRBD1	TRBJ2-7	0.0221405
		5	CASTHDNQPQHF	TRBV7-9	ND	TRBJ1-5	0.0143979
		6	CASSDLQGAGYTF	TRBV10-2	TRBD1	TRBJ1-2	0.0100259
		7	CASSLTGNTEAFF	TRBV12-3	ND	TRBJ1-1	0.00872991
		8	CASSQDGAGINQPQHF	TRBV4-2	TRBD1	TRBJ1-5	0.0076903
		9	CASSSVGGDGYTF	TRBV7-6	TRBD2	TRBJ1-2	0.00665543
		10	CASSLVADGYEQYF	TRBV12-3	TRBD2	TRBJ2-7	0.0059766
	Post1	1	CASIGQGGYNEQFF	TRBV5-1	TRBD1	TRBJ2-1	0.027347
		2	CSARDLSGGKYNEQFF	TRBV20-1	TRBD2	TRBJ2-1	0.0180553
		3	CASSLGQDTEAFF	TRBV7-3	TRBD1	TRBJ1-1	0.015357
		4	CLDPSGGLGYTF	TRBV27	ND	TRBJ1-2	0.0147235
		5	CASKDF	TRBV23-1	ND	TRBJ2-7	0.012905
		6	CASSYGPGTVGPDEQFF	TRBV6-5	TRBD1	TRBJ2-1	0.0104531
		7	CASTPVGDSPLHF	TRBV10-2	ND	TRBJ1-6	0.0100659
		8	CASSQDTGGYGYTF	TRBV3-1	TRBD1	TRBJ1-2	0.00889275
		9	CASSRSAWNSPLHF	TRBV9	ND	TRBJ1-6	0.00886928
		10	CASSSVGGSGYTF	TRBV7-6	TRBD1	TRBJ1-2	0.00857599
0010	Pre	1	CASSQVGLGPDGGYTF	TRBV4-1	TRBD2	TRBJ1-2	0.0327937
		2	CASSSTGPSSYEQYF	TRBV7-9	TRBD1	TRBJ2-7	0.0225345
		3	CASSDSLEKGELFF	TRBV6-4	ND	TRBJ2-2	0.0142916
		4	CSARGVSPSGPLETQYF	TRBV20-1	TRBD2	TRBJ2-5	0.0139951
		5	CASPLKRETGGWLETQYF	TRBV27	TRBD1	TRBJ2-5	0.0136393
		6	CASSLMASGQETQYF	TRBV11-2	TRBD2	TRBJ2-5	0.0123347
		7	CASSLASGPYEQYF	TRBV7-3	TRBD2	TRBJ2-7	0.0122161
		8	CATSDGPLGYTF	TRBV24-1	TRBD2	TRBJ1-2	0.0114452
		9	CSARVDSSETEAFF	TRBV20-1	ND	TRBJ1-1	0.0113859
		10	CSASAGGQYNEQFF	TRBV20-1	TRBD2	TRBJ2-1	0.0112673
	Post1	1	CASSQEPGVDTGELFF	TRBV4-1	TRBD1	TRBJ2-2	0.107582
		2	CASSQDLAGQGPETQYF	TRBV4-1	TRBD1	TRBJ2-5	0.0523717
		3	CASSSPNGGTKNIQYF	TRBV7-9	TRBD1	TRBJ2-4	0.029327
		4	CASSFQGSADYEQYF	TRBV27	TRBD1	TRBJ2-7	0.0164964
		5	CASSQVGLGPDGGYTF	TRBV4-1	TRBD2	TRBJ1-2	0.0158
		6	CASSLASGPYEQYF	TRBV7-3	TRBD2	TRBJ2-7	0.013556
		7	CSVPLGNNEQFF	TRBV29-1	TRBD1	TRBJ2-1	0.0112781
		8	CASTSGTTPYEQYF	TRBV27	TRBD2	TRBJ2-7	0.0112007
		9	CASSLDTGTTEQYF	TRBV5-1	TRBD1	TRBJ2-7	0.00991914
		10	CASRKGGYNEQFF	TRBV7-9	TRBD1	TRBJ2-1	0.00929043
0011	Pre	1	CASSFSSGTGGRGTEAFF	TRBV27	TRBD1	TRBJ1-1	0.0752664
		2	CASSLWGNTEAFF	TRBV11-1	ND	TRBJ1-1	0.0594243
		3	CATSGRADTDTQYF	TRBV24-1	TRBD2	TRBJ2-3	0.0411109
		4	CASSIHQKNTEAFF	TRBV19	ND	TRBJ1-1	0.0360702
		5	CATSDGTDTGELFF	TRBV24-1	TRBD1	TRBJ2-2	0.0173641
		6	CAISESGQEQYF	TRBV10-3	TRBD1	TRBJ2-7	0.0165622
		7	CASSVGTGDSYEQYF	TRBV6-1	TRBD1	TRBJ2-7	0.0159239
		8	CASSFEGETQYF	TRBV6-6	ND	TRBJ2-5	0.0155475
		9	CASSDMTGGDYEQYF	TRBV2	TRBD1	TRBJ2-7	0.0126999
		10	CASSPTANTEAFF	TRBV7-6	TRBD1	TRBJ1-1	0.012258
	Post1	1	CASSDMTGGDYEQYF	TRBV2	TRBD1	TRBJ2-7	0.112317
		2	CASSFSSGTGGRGTEAFF	TRBV27	TRBD1	TRBJ1-1	0.100884
		3	CASSLWGNTEAFF	TRBV11-1	ND	TRBJ1-1	0.0601173
		4	CASCLQTGSGTEAFF	TRBV28	TRBD1	TRBJ1-1	0.0390091
		5	CASSPGTSGVQETQYF	TRBV5-1	TRBD2	TRBJ2-5	0.023792
		6	CASSIHQKNTEAFF	TRBV19	ND	TRBJ1-1	0.0201822
		7	CASSFLAGENEQYF	TRBV5-1	TRBD2	TRBJ2-7	0.0177936
		8	CASSLETVNTEAFF	TRBV7-6	TRBD1	TRBJ1-1	0.0151098
		9	CATSGRADTDTQYF	TRBV24-1	TRBD2	TRBJ2-3	0.0116611
		10	CASSPSLGTGGLEQYF	TRBV27	TRBD1	TRBJ2-7	0.0108023
A Variable (V), Diversity (D) and Joining (J) segment of TCRs were represented in IMGT gene nomenclature.
ND; Not determined by MiXCR
